# Supplementary material
Source: PubMed Central journal article supplement (PMC6540994)
Supplement: NIHMS1525308-supplement-3.pdf [file NIHMS1525308-supplement-3.pdf]

**Supplemental Table 1. Analytes Evaluated as Possible Biomarkers for Predicting CRT Response; Discovery, Validation and Full Analysis Phases of Samples from the SMART-AV Trial**

| Analyte               |            |               |                   |                           | Discovery<br>(25 resp / 25 non- resp) |             |             |       |             | Validation<br>(25 resp / 25 non- resp) |             | Full Analysis<br>(390 resp / 388 non- resp) |             |
|-----------------------|------------|---------------|-------------------|---------------------------|---------------------------------------|-------------|-------------|-------|-------------|----------------------------------------|-------------|---------------------------------------------|-------------|
| Name                  | Assay Type | Cat. #        | Manufacturer      | Biological Function       | % undetectable                        | intra-assay | inter-assay | AUC   | correlation | AUC                                    | correlation | AUC                                         | correlation |
| ST2/IL1RL1            | ELISA      | DST200        | R&D Systems       | Cytokine Receptor         | 0%                                    | 16%         | 10%         | 0.631 | 0.114       | 0.627                                  | 0.127       | 0.582                                       | 0.105       |
| sTNF RII              | MSA        | HSCR-32K      | Millipore         | Cytokine Receptor         | 0%                                    | 13%         | 12%         | 0.59  | 0.115       | 0.591                                  | 0.113       | 0.573                                       | 0.026       |
| CRP                   | ELISA      | DCP00         | R&D Systems       | Acute Phase Protein       | 0%                                    | 39%         | 17%         | 0.641 | 0.362       | 0.59                                   | 0.184       | 0.569                                       | 0.074       |
| NTproBNP (8-29)       | EIA        | 04-BI-20852   | ALPCO Immuno.     | Neuro-hormone             | 0%                                    | 42%         | 24%         | 0.711 | 0.292       | 0.652                                  | 0.235       | 0.545                                       | 0.079       |
| MMP-2                 | MSA        | LMP000        | R&D Systems       | Matrix Remodeling         | 0%                                    | 19%         | 58%         | 0.709 | 0.401       | 0.507                                  | 0.003       | 0.542                                       | 0.072       |
| TIMP-2                | MSA        | LKT003        | R&D Systems       | Matrix Remodeling         | 0%                                    | 8%          | 34%         | 0.512 | 0.035       |                                        |             | 0.53                                        | 0.041       |
| sgp130                | MSA        | HSCR-32K      | Millipore         | Cytokine Receptor Complex | 0%                                    | 9%          | 28%         | 0.518 | 0.116       | 0.542                                  | 0.119       | 0.528                                       | 0.028       |
| TIMP-1                | MSA        | LKT003        | R&D Systems       | Matrix Remodeling         | 2%                                    | 19%         | 25%         | 0.554 | 0.091       | 0.51                                   | -0.126      | 0.526                                       | 0.018       |
| sIL-2R $\alpha$ /CD25 | MSA        | HSCR-32K      | Millipore         | Cytokine Receptor         | 2%                                    | 24%         | 41%         | 0.525 | 0.1         | 0.532                                  | 0.1         | 0.52                                        | -0.005      |
| TIMP-4                | MSA        | LKT003        | R&D Systems       | Matrix Remodeling         | 0%                                    | 13%         | 13%         | 0.667 | 0.006       |                                        |             | 0.52                                        | -0.007      |
| MMP-9                 | MSA        | LMP000        | R&D Systems       | Matrix Remodeling         | 0%                                    | 11%         | 41%         | 0.594 | 0.234       | 0.513                                  | -0.01       | 0.506                                       | 0.035       |
| IFN $\gamma$          | MSA        | MPXHCYTO-60KP | Millipore         | Cytokine                  | 0%                                    | 52%         | 104%        | 0.682 | 0.111       | 0.587                                  | 0.002       | 0.501                                       | 0.044       |
| sVCAM-I               | MSA        | HCVD1-67AK    | Millipore         | Cell Adhesion Molecule    | 0%                                    | 14%         | 22%         | 0.503 | -0.123      | 0.63                                   | 0.113       |                                             |             |
| sIL-4R                | MSA        | HSCR-32K      | Millipore         | Cytokine Receptor         | 0%                                    | 10%         | 47%         | 0.613 | 0.193       | 0.557                                  | 0.053       |                                             |             |
| IL-12 (p70)           | MSA        | MPXHCYTO-60KP | Millipore         | Cytokine                  | 56%                                   |             |             | 0.555 | 0.239       | 0.542                                  | 0.015       |                                             |             |
| GDF-15                | ELISA      | DGD150        | R&D Systems       | Growth Factor             | 0%                                    | 11%         | 24%         | 0.586 | 0.159       | 0.523                                  | 0.062       |                                             |             |
| G-CSF                 | MSA        | MPXHCYTO-60KP | Millipore         | Growth Factor             | 4%                                    | 57%         | 84%         | 0.541 | 0.0235      | 0.511                                  | 0.118       |                                             |             |
| sVAP-1                | ELISA      | RBMS259R      | Biovendor         | Cell Adhesion Molecule    | 0%                                    | 15%         | 8%          | 0.595 | 0.141       |                                        |             |                                             |             |
| sE-Selectin           | MSA        | HCVD1-67AK    | Millipore         | Cell Adhesion Molecule    | 0%                                    | 13%         | 22%         | 0.588 | -0.062      |                                        |             |                                             |             |
| VEGF                  | MSA        | MPXHCYTO-60KP | Millipore         | Growth Factor             | 0%                                    | 27%         | 57%         | 0.585 | 0.073       |                                        |             |                                             |             |
| ICTP                  | EIA        | 5892          | OrionDiagnostic a | Matrix Remodeling         | 0%                                    | 21%         | 38%         | 0.573 | 0.156       |                                        |             |                                             |             |
| Eotaxin/CCL11         | MSA        | MPXHCYTO-60KP | Millipore         | Chemokine                 | 0%                                    | 29%         | 85%         | 0.57  | 0.056       |                                        |             |                                             |             |
| MMP-8                 | MSA        | LMP000        | R&D Systems       | Matrix Remodeling         | 0%                                    | 14%         | 43%         | 0.567 | 0.09        |                                        |             |                                             |             |
| TNF $\alpha$          | MSA        | MPXHCYTO-60KP | Millipore         | Cytokine                  | 0%                                    | 33%         | 41%         | 0.549 | -0.138      |                                        |             |                                             |             |
| sIL-1RII/sCD121b      | MSA        | HSCR-32K      | Millipore         | Cytokine Receptor         | 0%                                    | 15%         | 19%         | 0.546 | -0.033      |                                        |             |                                             |             |
| sICAM-I               | MSA        | HCVD1-67AK    | Millipore         | Cell Adhesion Molecule    | 0%                                    | 19%         | 91%         | 0.544 | -0.033      |                                        |             |                                             |             |

| Analyte             |            |               |              |                           | Discovery               |                      |                      |       |             | Validation              |             | Full Analysis             |             |
|---------------------|------------|---------------|--------------|---------------------------|-------------------------|----------------------|----------------------|-------|-------------|-------------------------|-------------|---------------------------|-------------|
|                     |            |               |              |                           | (25 resp / 25 non-resp) |                      |                      |       |             | (25 resp / 25 non-resp) |             | (390 resp / 388 non-resp) |             |
| Name                | Assay Type | Cat. #        | Manufacturer | Biological Function       | % undetectable          | intra-assay CV (max) | inter-assay CV (max) | AUC   | correlation | AUC                     | correlation | AUC                       | correlation |
| MIP-1 $\beta$ /CCL4 | MSA        | MPXHCYTO-60KP | Millipore    | Chemokine                 | 0%                      | 8%                   | 71%                  | 0.543 | -0.098      |                         |             |                           |             |
| sVEGFR2             | MSA        | HSCR-32K      | Millipore    | Growth Factor Receptor    | 0%                      | 16%                  | 23%                  | 0.542 | -0.005      |                         |             |                           |             |
| TGF $\beta$ 1       | MSA        | LKT001        | R&D Systems  | Growth Factor             | 0%                      | 74%                  | 86%                  | 0.538 | 0.08        |                         |             |                           |             |
| sTNF RI             | MSA        | HSCR-32K      | Millipore    | Cytokine Receptor         | 0%                      | 16%                  | 30%                  | 0.537 | 0.008       |                         |             |                           |             |
| IGF-1               | ELISA      | DG100         | R&D Systems  | Growth Factor             | 0%                      | 33%                  | 45%                  | 0.534 | -0.328      |                         |             |                           |             |
| PAI-1               | MSA        | HCVD1-67AK    | Millipore    | Matrix Remodeling         | 0%                      | 19%                  | 47%                  | 0.532 | -0.211      |                         |             |                           |             |
| MCP-1/CCL2          | MSA        | MPXHCYTO-60KP | Millipore    | Chemokine                 | 0%                      | 29%                  | 65%                  | 0.529 | 0.005       |                         |             |                           |             |
| IP-10/CXCL10        | MSA        | MPXHCYTO-60KP | Millipore    | Chemokine                 | 0%                      | 30%                  | 71%                  | 0.528 | -0.183      |                         |             |                           |             |
| sIL-6R              | MSA        | HSCR-32K      | Millipore    | Cytokine Receptor         | 0%                      | 15%                  | 23%                  | 0.527 | -0.02       |                         |             |                           |             |
| MDC/CCL22           | MSA        | MPXHCYTO-60KP | Millipore    | Chemokine                 | 0%                      | 18%                  | 42%                  | 0.522 | 0.123       |                         |             |                           |             |
| sEGFR               | MSA        | HSCR-32K      | Millipore    | Growth Factor Receptor    | 0%                      | 19%                  | 17%                  | 0.52  | 0.023       |                         |             |                           |             |
| Endoglin            | ELISA      | DNDG00        | R&D Systems  | Cytokine Receptor Complex | 0%                      | 14%                  | 10%                  | 0.518 | 0.035       |                         |             |                           |             |
| TGF $\beta$ 2       | MSA        | LKT001        | R&D Systems  | Cytokine                  | 0%                      | 51%                  | 65%                  | 0.504 | 0.038       |                         |             |                           |             |
| GRO                 | MSA        | MPXHCYTO-60KP | Millipore    | Chemokine                 | 2%                      | 10%                  | 29%                  | 0.549 | -0.034      |                         |             |                           |             |
| FGF-2               | MSA        | MPXHCYTO-60KP | Millipore    | Growth factor             | 2%                      | 23%                  | 46%                  | 0.519 | 0.072       |                         |             |                           |             |
| MMP-3               | MSA        | LMP000        | R&D Systems  | Matrix Remodeling         | 2%                      | 9%                   | 14%                  | 0.501 | -0.144      |                         |             |                           |             |
| MPO                 | MSA        | HCVD1-67AK    | Millipore    | peroxidase                | 4%                      | 8%                   | 142%                 | 0.613 | -0.095      |                         |             |                           |             |
| IL-8                | MSA        | MPXHCYTO-60KP | Millipore    | Chemokine                 | 4%                      | 26%                  | 84%                  | 0.584 | 0.004       |                         |             |                           |             |
| GM-CSF              | MSA        | MPXHCYTO-60KP | Millipore    | Growth Factor             | 4%                      | 42%                  | 68%                  | 0.55  | 0.033       |                         |             |                           |             |
| MCP-3/CCL7          | MSA        | MPXHCYTO-60KP | Millipore    | Chemokine                 | 8%                      | 10%                  | 34%                  | 0.697 | 0.12        |                         |             |                           |             |
| MMP-1               | MSA        | LMP000        | R&D Systems  | Matrix Remodeling         | 8%                      | 21%                  | 42%                  | 0.535 | -0.174      |                         |             |                           |             |
| Fibronectin         | EIA        | RBMS2028R     | Biovendor    | Matrix Remodeling         | 14%                     | 33%                  | 40%                  | 0.58  | -0.098      |                         |             |                           |             |
| IL-1ra              | MSA        | MPXHCYTO-60KP | Millipore    | Cytokine                  | 22%                     | 60%                  | 101%                 | 0.587 | 0.099       |                         |             |                           |             |
| EGF                 | MSA        | MPXHCYTO-60KP | Millipore    | Growth Factor             | 24%                     | 17%                  | 71%                  | 0.595 | 0.153       |                         |             |                           |             |
| IL-17               | MSA        | MPXHCYTO-60KP | Millipore    | Cytokine                  | 36%                     | 24%                  | 63%                  | 0.7   | 0.105       |                         |             |                           |             |
| TGF $\alpha$        | MSA        | MPXHCYTO-60KP | Millipore    | Growth Factor             | 42%                     | 13%                  | 6%                   | 0.607 | 0.03        |                         |             |                           |             |

| Analyte              |            |               |              |                     | Discovery                |                      |                      |       |             | Validation               |             | Full Analysis              |             |
|----------------------|------------|---------------|--------------|---------------------|--------------------------|----------------------|----------------------|-------|-------------|--------------------------|-------------|----------------------------|-------------|
|                      |            |               |              |                     | (25 resp / 25 non- resp) |                      |                      |       |             | (25 resp / 25 non- resp) |             | (390 resp / 388 non- resp) |             |
| Name                 | Assay Type | Cat. #        | Manufacturer | Biological Function | % undetectable           | intra-assay CV (max) | inter-assay CV (max) | AUC   | correlation | AUC                      | correlation | AUC                        | correlation |
| MIP-1 $\alpha$ /CCL3 | MSA        | MPXHCYTO-60KP | Millipore    | Chemokine           | 44%                      | NC                   | NC                   | 0.714 | -0.3        |                          |             |                            |             |
| MMP-12               | MSA        | LMP000        | R&D Systems  | Matrix Remodeling   | 50%                      | NC                   | NC                   | 0.565 | 0.029       |                          |             |                            |             |
| IL-7                 | MSA        | MPXHCYTO-60KP | Millipore    | Cytokine            | 52%                      | NC                   | NC                   | 0.591 | -0.063      |                          |             |                            |             |
| MMP-13               | MSA        | LMP000        | R&D Systems  | Matrix Remodeling   | 54%                      | NC                   | NC                   | 0.639 | 0.327       |                          |             |                            |             |
| TNF $\beta$          | MSA        | MPXHCYTO-60KP | Millipore    | Growth Factor       | 54%                      | NC                   | NC                   | 0.612 | -0.022      |                          |             |                            |             |
| IL-15                | MSA        | MPXHCYTO-60KP | Millipore    | Cytokine            | 54%                      | NC                   | NC                   | 0.558 | -0.023      |                          |             |                            |             |
| Fractalkine/CX3CL1   | MSA        | MPXHCYTO-60KP | Millipore    | Chemokine           | 54%                      | NC                   | NC                   | 0.519 | 0.047       |                          |             |                            |             |
| IL-3                 | MSA        | MPXHCYTO-60KP | Millipore    | Cytokine            | 56%                      | NC                   | NC                   | 0.618 | 0.098       |                          |             |                            |             |
| IL-2                 | MSA        | MPXHCYTO-60KP | Millipore    | Cytokine            | 58%                      | NC                   | NC                   | 0.62  | -0.045      |                          |             |                            |             |
| IL-10                | MSA        | MPXHCYTO-60KP | Millipore    | Cytokine            | 62%                      | NC                   | NC                   | 0.525 | -0.3        |                          |             |                            |             |
| IL-9                 | MSA        | MPXHCYTO-60KP | Millipore    | Cytokine            | 62%                      | NC                   | NC                   | 0.506 | 0.037       |                          |             |                            |             |
| IL-5                 | MSA        | MPXHCYTO-60KP | Millipore    | Cytokine            | 64%                      | NC                   | NC                   | 0.621 | -0.007      |                          |             |                            |             |
| IL-1 $\beta$         | MSA        | MPXHCYTO-60KP | Millipore    | Cytokine            | 64%                      | NC                   | NC                   | 0.556 | -0.088      |                          |             |                            |             |
| IL-6                 | MSA        | MPXHCYTO-60KP | Millipore    | Cytokine            | 66%                      | NC                   | NC                   | 0.65  | -0.079      |                          |             |                            |             |
| IL-1 $\alpha$        | MSA        | MPXHCYTO-60KP | Millipore    | Cytokine            | 68%                      | NC                   | NC                   | 0.641 | -0.087      |                          |             |                            |             |
| Flt-3 ligand         | MSA        | MPXHCYTO-60KP | Millipore    | Cytokine            | 68%                      | NC                   | NC                   | 0.556 | 0.053       |                          |             |                            |             |
| IL-13                | MSA        | MPXHCYTO-60KP | Millipore    | Cytokine            | 68%                      | NC                   | NC                   | 0.545 | -0.092      |                          |             |                            |             |
| Adiponectin          | MSA        | HCV D1-67AK   | Millipore    | Hormone             | 73%                      | NC                   | NC                   | 0.517 | -0.171      |                          |             |                            |             |
| IL-4                 | MSA        | MPXHCYTO-60KP | Millipore    | Cytokine            | 80%                      | NC                   | NC                   | 0.54  | -0.156      |                          |             |                            |             |
| Troponin-I           | ELISA      | EA-0301       | Signosis Inc | Myocyte Injury      | 100%                     | NC                   | NC                   |       |             |                          |             |                            |             |
| TGF $\beta$ III      | MSA        | LKT001        | R&D Systems  | Cytokine            | 100%                     | NC                   | NC                   |       |             |                          |             |                            |             |
| TIMP-3               | MSA        | LKT003        | R&D Systems  | Matrix Remodeling   | 100%                     | NC                   | NC                   |       |             |                          |             |                            |             |
| <b>Count</b>         |            |               |              |                     | <b>74</b>                |                      |                      |       |             | <b>15</b>                |             | <b>12</b>                  |             |

NC: Not Computed
